# Supplementary material for: New In Situ Aerosol Hyperspectral Optical Measurements over 300–700 nm, Part 1: Spectral Aerosol Extinction (SpEx) Instrument Field Validation during the KORUS-OC cruise
Source: Copernicus journal article supplement (doi:10.5194/amt-2020-317), 2020-08-19
Supplement: Supplementary file 1 [file amt-2020-317-supplement.pdf]

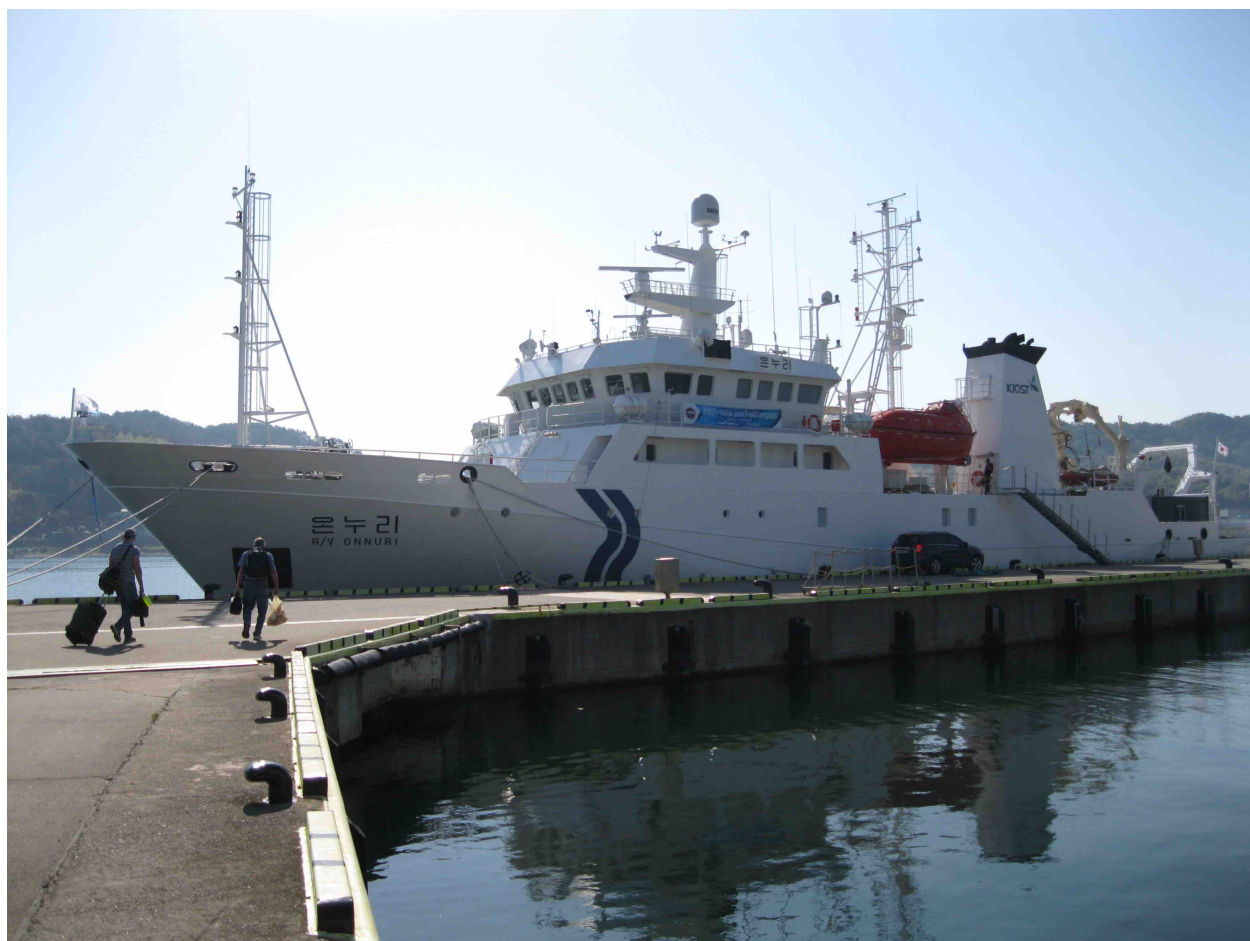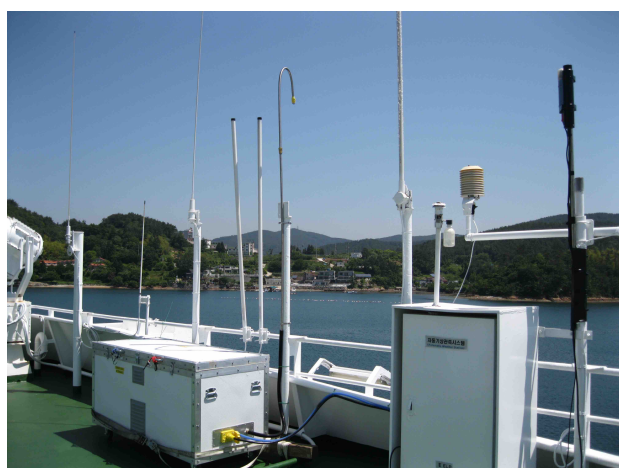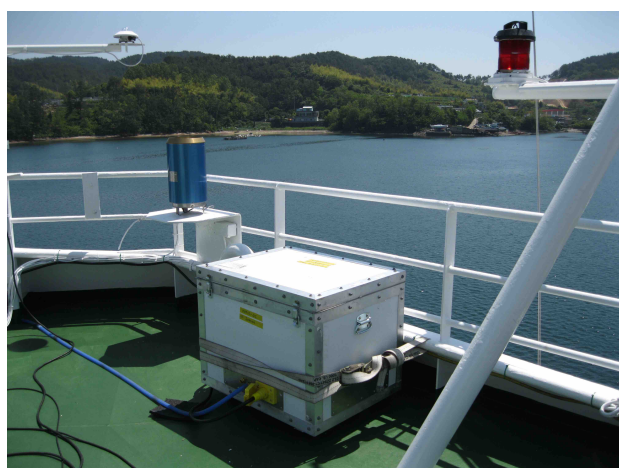

**Figure S1.** *R/V Onnuri* (top photo); instruments housed in custom-built box sited along the starboard rail above the bridge (long box, left half of bottom left photo, with tall curved sampling mast just to its right); pumps housed in a separate box located a few meters away along the stern rail (bottom right photo).

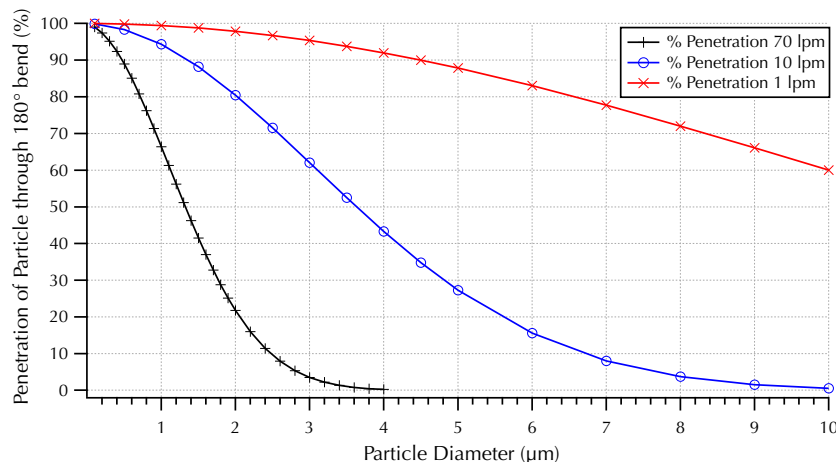

**Figure S2.** Illustration of the relationship between flow rate and size cut of the sampled aerosol particles.

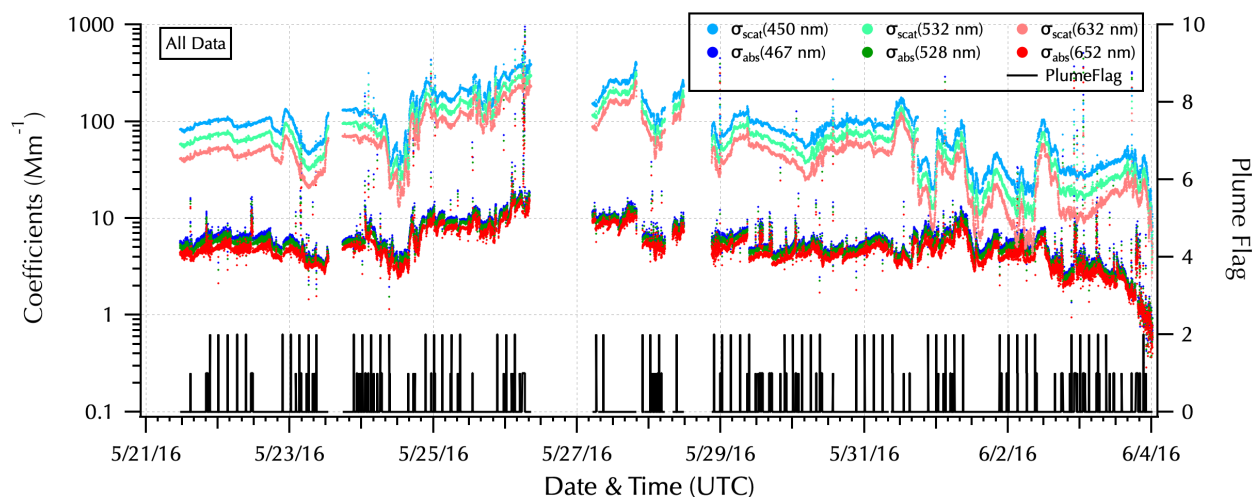

**Figure S3.** All scattering coefficients ( $\sigma_{\text{scat}}$ , light shades) and absorption coefficients ( $\sigma_{\text{abs}}$ , dark shades) averaged to 1 minute intervals during the cruise (left axis, units of  $\text{Mm}^{-1}$ ), along with plume flags (right axis, = 0 ambient data, = 1 ship exhaust interception, and = 2 filter changes).

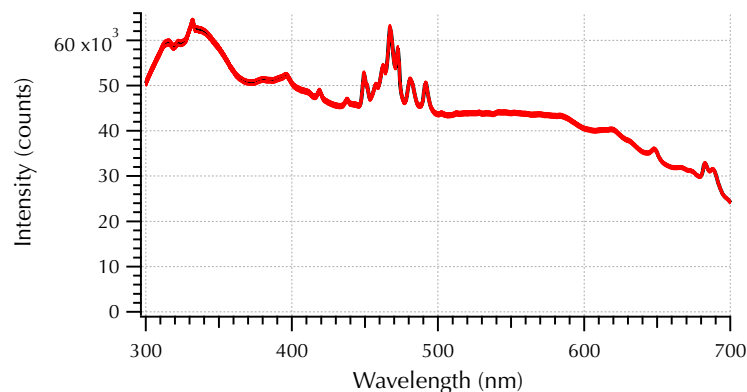

**Figure S4.** Example of a one hour set of intensity spectra that illustrate the two wavelengths (332 nm and 467 nm) that sometimes saturated due to drift in the lamp intensity.

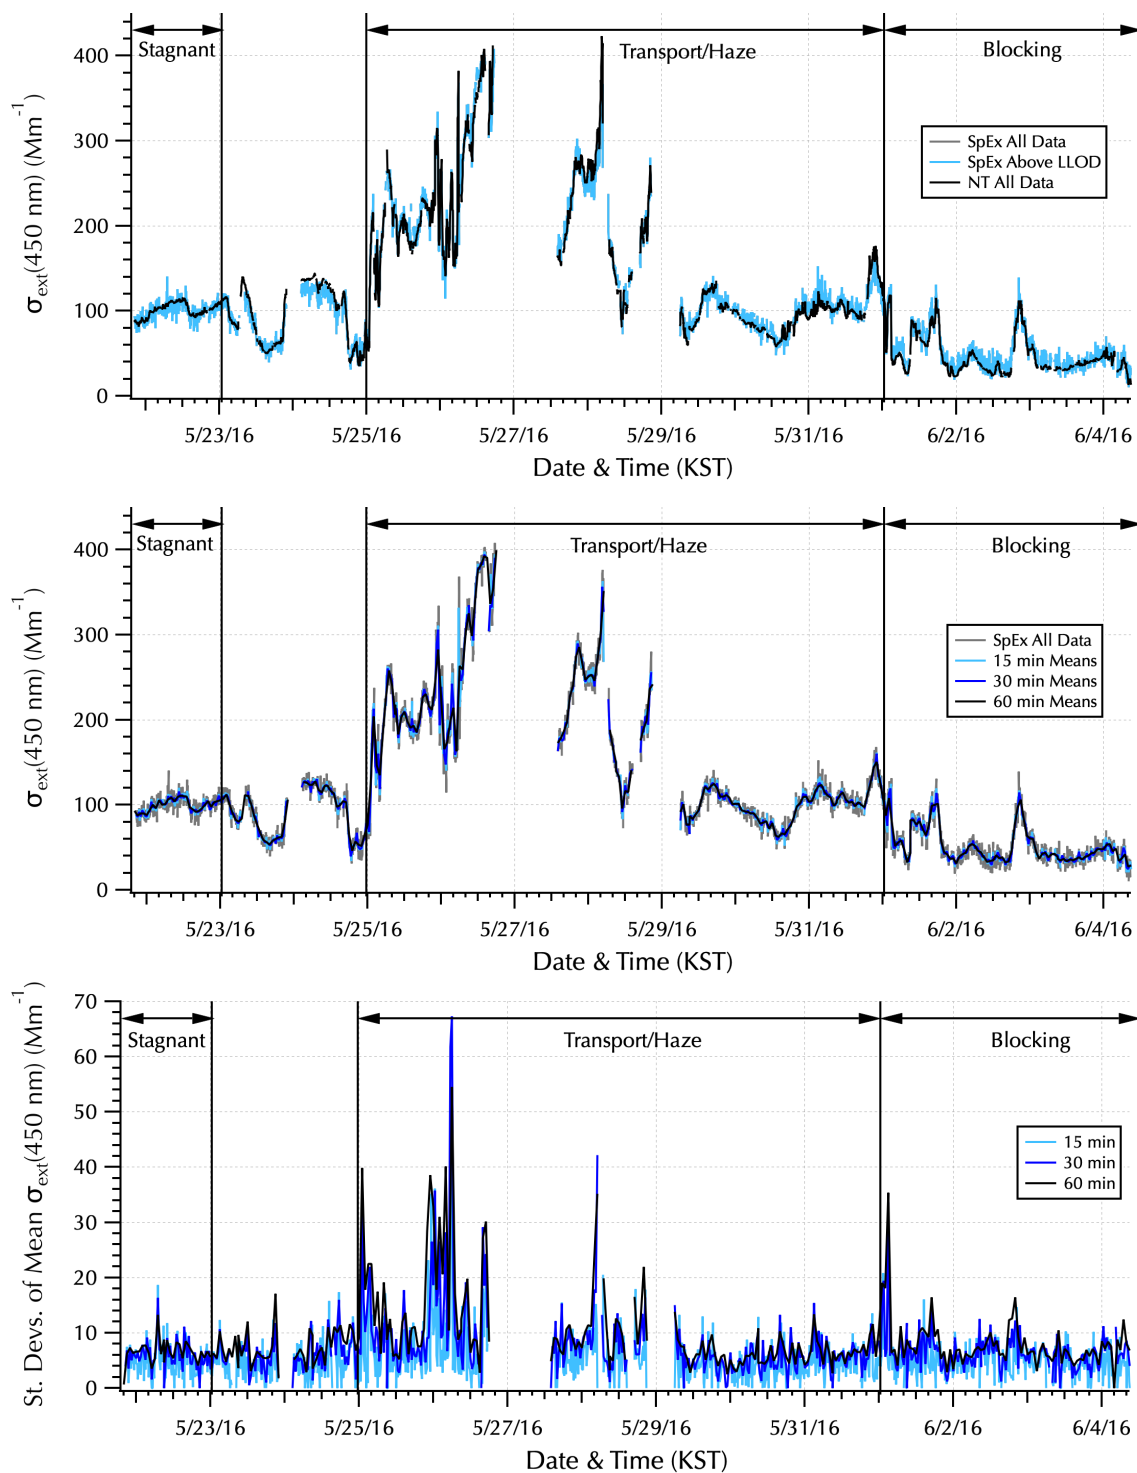

**Figure S5.** Time series of 450 nm  $\sigma_{\text{ext}} (\text{Mm}^{-1})$  throughout the cruise. Top panel: SpEx (all data, gray; above LLOD, blue; these curves are entirely coincident as there were no below detection values at this wavelength) with NT  $\sigma_{\text{ext}}$  (black). Middle panel: SpEx (all data, gray) with 15 min (light blue), 30 min (dark blue), and 60 min (black) means. Bottom panel: SpEx standard deviations of the 15 min (light blue), 30 min (dark blue), and 60 min (black) means. Meteorological periods shown as in Fig. 2.

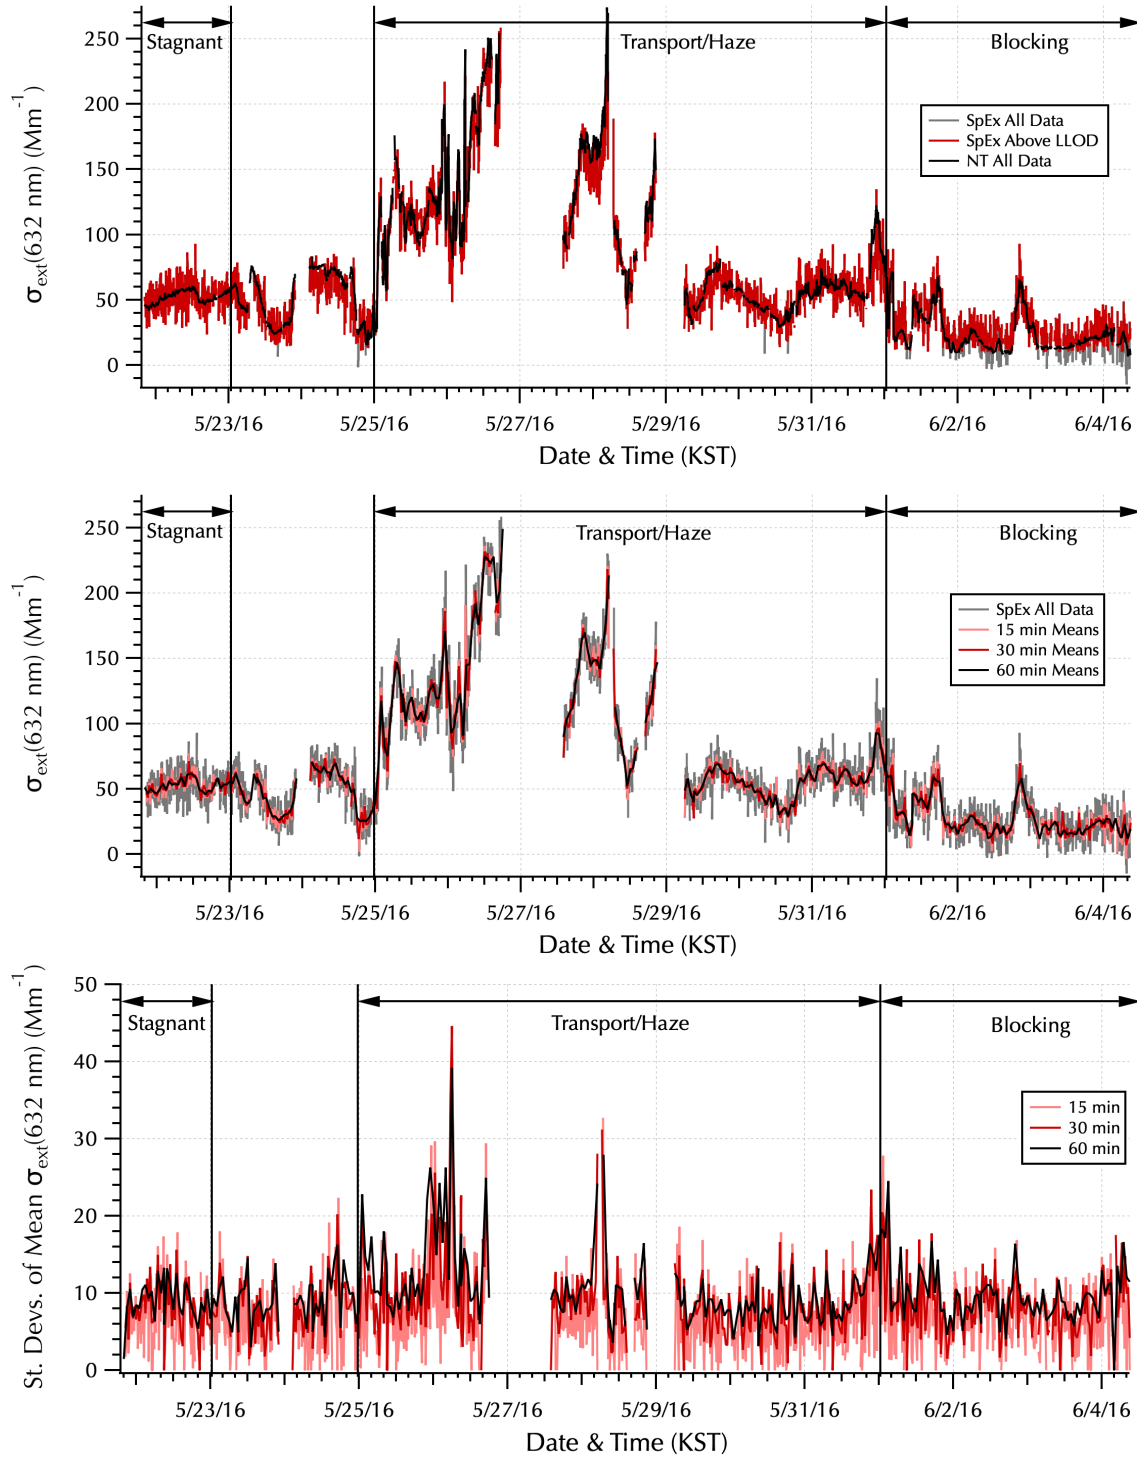

**Figure S6.** Time series of 632 nm  $\sigma_{\text{ext}}$  ( $\text{Mm}^{-1}$ ) throughout the cruise. Top panel: SpEx (all data, gray; above LLOD, red; these curves are coincident except for when the lowest values are below detection and hence, appear gray) with NT  $\sigma_{\text{ext}}$  (black). Middle panel: SpEx (all data, gray) with 15 min (light red), 30 min (dark red), and 60 min (black) means. Bottom panel: SpEx standard deviations of the 15 min (light red), 30 min (dark red), and 60 min (black) means. Meteorological periods shown as in Fig. 2.
